# Supplementary material
Source: PubMed Central journal article supplement (PMC7489394)
Supplement: jamapediatr-e203345-s001.pdf [file jamapediatr-e203345-s001.pdf]

## Supplementary Online Content

Zhao F, Egelman S, Weeks HM, Kaciroti N, Miller AL, Radesky JS. Data collection practices of mobile applications played by preschool-aged children. *JAMA Pediatr*. Published online September 8, 2020. doi:10.1001/jamapediatrics.2020.3345

**eTable 1.** Number of Users, Data Transmissions, Unique Data Type Transmissions, and Third Party Domains, 451 Android Apps Played by 124 Preschool-Aged Children

**eTable 2.** Transmission and Domain Counts by DFF Status and App Popularity

**eTable 3.** Top 50 Most Common Third-Party Domains to Which Identifiers Were Transmitted by Apps Analyzed in the Current Study

This supplementary material has been provided by the authors to give readers additional information about their work.

**eTable 1. Number of Users, Data Transmissions, Unique Data Type Transmissions, and Third Party Domains, 451 Android Apps Played by 124 Preschool-Aged Children**

| App Package Name                                                                                                              | App Name                               | Number of persistent identifier transmissions | Number of unique data types transmitted | Number of unique third party domains |
|-------------------------------------------------------------------------------------------------------------------------------|----------------------------------------|-----------------------------------------------|-----------------------------------------|--------------------------------------|
| com.game5mobile.lineandwater                                                                                                  | Happy Glass                            | 57                                            | 2                                       | 33                                   |
| com.kwalee.wantedgp                                                                                                           | Police Pursuit                         | 57                                            | 2                                       | 29                                   |
| com.outfit7.talkingtom                                                                                                        | Talking Tom Cat                        | 51                                            | 2                                       | 29                                   |
| com.gamecircus.PrizeClaw                                                                                                      | Prize Claw                             | 49                                            | 4                                       | 14                                   |
| com.supertapx.bigbigballer                                                                                                    | Big Big Baller                         | 48                                            | 2                                       | 30                                   |
| com.ketchapp.rotator                                                                                                          | Rotator                                | 48                                            | 2                                       | 29                                   |
| com.bigframes.color_road                                                                                                      | Color Road                             | 46                                            | 3                                       | 32                                   |
| com.crowdstar.covetHome                                                                                                       | Design Home                            | 46                                            | 2                                       | 16                                   |
| io.voodoo.holeio                                                                                                              | Hole.io                                | 44                                            | 3                                       | 25                                   |
| com.h8games.helixjump                                                                                                         | Helix Jump                             | 42                                            | 3                                       | 30                                   |
| com.sega.sonicdash                                                                                                            | Sonic Dash                             | 40                                            | 2                                       | 21                                   |
| com.leodesol.games.classic.maze.labyrinth                                                                                     | Mazes & More                           | 40                                            | 1                                       | 23                                   |
| com.ketchapp.pineapplepen                                                                                                     | Pineapple Pen                          | 39                                            | 2                                       | 30                                   |
| com.outfit7.talkingtom2free                                                                                                   | Talking Tom Cat 2                      | 37                                            | 3                                       | 26                                   |
| com.crazylabs.amaze.game                                                                                                      | AMAZE!                                 | 36                                            | 2                                       | 21                                   |
| com.ketchapp.mrgun                                                                                                            | Mr Gun                                 | 35                                            | 2                                       | 20                                   |
| com.playgendary.kickthebuddy                                                                                                  | Kick the Buddy                         | 34                                            | 2                                       | 16                                   |
| furniture.mods.ran                                                                                                            | furniture mod                          | 34                                            | 4                                       | 25                                   |
| com.sega.sprint                                                                                                               | Sonic Forces                           | 33                                            | 2                                       | 20                                   |
| com.parking.game                                                                                                              | Drive and Park                         | 32                                            | 2                                       | 23                                   |
| com.outfit7.mytalkinghank                                                                                                     | My Talking Hank                        | 32                                            | 3                                       | 23                                   |
| tv.peel.app                                                                                                                   | Peel Universal Smart TV Remote Control | 32                                            | 7                                       | 10                                   |
| com.buildingcraftingames.top.gun.minecraft.free.plane.build.craft.exploration.game.lite.pocket.mcp.e.roblox.sky.world.war.jet | Plane Craft: Square Air                | 32                                            | 2                                       | 23                                   |
| com.outfit7.talkingtomgoldrun                                                                                                 | Talking Tom Gold Run                   | 31                                            | 1                                       | 24                                   |
| com.outfit7.talkinggingerfree                                                                                                 | Talking Ginger                         | 31                                            | 2                                       | 17                                   |

|                                                                                                                                 |                                                   |    |   |    |
|---------------------------------------------------------------------------------------------------------------------------------|---------------------------------------------------|----|---|----|
| com.playcoolzombiesportgames.space.mine.craft.exploration.lite.build.minecraft.voxel.creative.cosmos.galaxy.sandbox.cube.pixel  | Space Craft                                       | 30 | 2 | 23 |
| com.playgendary.tom                                                                                                             | Tomb of the Mask                                  | 29 | 2 | 20 |
| com.supertapx.lovedots                                                                                                          | Love Balls                                        | 29 | 2 | 20 |
| com.outfit7.jigty.jelly                                                                                                         | Jigty Jelly                                       | 29 | 3 | 17 |
| com.outfit7.talkingtomjetski2                                                                                                   | Talking Tom Jetski 2                              | 29 | 2 | 21 |
| com.aim.racing                                                                                                                  | Extreme Car Driving Simulatr                      | 28 | 2 | 13 |
| com.survivalcrafting.rc.minecraft.t.helicopter.games.flight.flying.simulator.fly.aircraft.heli.craft.plane.gunship.chopper.free | Helicopter Craft: Flying & Crafting Game 2018     | 27 | 2 | 20 |
| com.outfit7.mytalkingangelafree                                                                                                 | My Talking Angela                                 | 27 | 3 | 22 |
| com.terrorist.shooter.lu                                                                                                        | Terrorist Shooter                                 | 27 | 2 | 11 |
| com.ea.BejeweledBlitz_na                                                                                                        | Bejeweled Blitz                                   | 26 | 2 | 5  |
| com.miniclip.bowmasters                                                                                                         | Bowmasters                                        | 26 | 2 | 21 |
| com.sega.sonic1px                                                                                                               | Sonic the Hedgehog Classic                        | 25 | 1 | 14 |
| com.nordcurrent.canteenhd                                                                                                       | Cooking Fever                                     | 25 | 2 | 13 |
| com.ludia.dragons                                                                                                               | Dragons: Rise of Berk                             | 24 | 2 | 14 |
| com.junegaming.ninjafunrace                                                                                                     | Ninja Race - Fun Run Multiplayer                  | 24 | 2 | 14 |
| com.playgendary.tanks                                                                                                           | Tank Stars                                        | 24 | 2 | 18 |
| com.ketchapp.thefloorislava                                                                                                     | The Floor Is lava                                 | 24 | 2 | 17 |
| com.riseup.game                                                                                                                 | Rise Up                                           | 23 | 2 | 17 |
| com.lastpass.lpandroid                                                                                                          | Lastpass Password Manager                         | 22 | 2 | 4  |
| com.pmg.speed                                                                                                                   | SpeedBall                                         | 22 | 3 | 14 |
| com.ketchapp.rider                                                                                                              | Rider                                             | 21 | 2 | 17 |
| com.dodreams.driveahead                                                                                                         | Drive Ahead!                                      | 21 | 2 | 15 |
| com.sega.sonicjumpfever                                                                                                         | Sonic Jump Fever                                  | 21 | 2 | 15 |
| com.outfit7.mytalkingtomfree                                                                                                    | My Talking Tom                                    | 19 | 2 | 17 |
| com.fungames.blockcraft                                                                                                         | Block Craft 3D: Building Simulator Games For Free | 19 | 2 | 16 |
| com.crazylabs.sausage.run                                                                                                       | Run Sausage Run!                                  | 19 | 2 | 10 |
| com.alien.shooter.galaxy.attack                                                                                                 | Galaxy Attack: Alien Shooter                      | 19 | 2 | 12 |

|                                            |                                                  |    |   |    |
|--------------------------------------------|--------------------------------------------------|----|---|----|
| com.ea.game.pvzfree_row                    | Plants vs. Zombies FREE                          | 19 | 2 | 11 |
| com.strawdogstudios.simonscatpoptime       | Simon's Cat - Pop Time                           | 19 | 2 | 15 |
| com.scopely.whiplash                       | WWE Champions 2019                               | 19 | 3 | 10 |
| com.jamcity.snoopypop                      | Snoopy Pop - Free Match, Blast & Pop Buble Game  | 18 | 4 | 10 |
| com.geishatokyo.snowballio                 | Snowball.io                                      | 18 | 3 | 11 |
| com.outfit7.gingersbirthdayfree            | Talking Ginger 2                                 | 18 | 2 | 13 |
| com.sega.sonic2.runner                     | Sonic The Hedgehog 2 Classic                     | 17 | 2 | 12 |
| com.fingersoft.hcr2                        | Hill Climb Racing 2                              | 17 | 2 | 15 |
| com.hutchgames.hotwheels                   | Hot Wheels: Race Off                             | 17 | 2 | 16 |
| com.crazylabs.lady.bug                     | Miraculous Ladybug& Cat Noir - The Official Game | 17 | 2 | 17 |
| es.socialpoint.MonsterLegends              | Monster Legends                                  | 17 | 3 | 5  |
| com.backflipstudios.android.ninj umpdeluxe | NinJump DLX: Endless Ninja Fun                   | 17 | 5 | 7  |
| tv.peel.samsung.app                        | Peel Smart Remote TV Guide                       | 17 | 6 | 8  |
| com.cmplay.bricksnballs                    | Bricks n Balls                                   | 16 | 5 | 13 |
| com.YovoGames.carRepair3                   | Repair machines - monster trucks                 | 16 | 2 | 6  |
| com.kintor.grannymods                      | Scary Granny Mods - Horror House Escape          | 16 | 4 | 12 |
| com.launchshipstudios.dots.connect         | Spots Connect                                    | 16 | 4 | 11 |
| com.cyberlink.youcammakeup                 | YouCam Makeup- Magic Selfie Makeovers            | 16 | 2 | 14 |
| com.dvloper.granny                         | Granny                                           | 15 | 2 | 12 |
| com.cocoplay.puppyparty                    | Puppy Life - Secret Pet Party                    | 15 | 2 | 10 |
| com.zhiliaoapp.musically                   | TikTok                                           | 15 | 4 | 10 |
| com.sinyee.babybus.magichouse              | Baby Panda's Color Mixing Studio                 | 15 | 1 | 9  |
| com.hippo.SantasWorkshop                   | Santa's workshop: Christmas Eve                  | 15 | 2 | 12 |
| com.timuzgames.shooting.games              | Shooting Master 3D                               | 15 | 2 | 13 |

|                                             |                                                    |    |   |    |
|---------------------------------------------|----------------------------------------------------|----|---|----|
| com.camera.beautycam                        | Snapfun - Face Filter, Selfie Editor, Sweet Camera | 15 | 3 | 8  |
| com.tabtale.babytwins                       | Baby Twins - Newborn Care                          | 14 | 1 | 10 |
| com.gpp.beefactory                          | Bee Factory                                        | 14 | 1 | 12 |
| com.agminstruments.drumpadmachine           | Drum Pad Machine - Make Beats                      | 14 | 2 | 9  |
| com.Chateau.SanicNoAds                      | Free Version for Sanic Ball                        | 14 | 2 | 9  |
| eu.bandainamcoent.mytamagotchiforever       | My Tamagotchi Forever                              | 14 | 2 | 12 |
| com.mightykingdom.shopkinscutiecars         | Shopkins: Cutie Cars                               | 14 | 2 | 11 |
| com.sx.wonsterwords                         | Wonster ABC Phonics Spelling                       | 14 | 2 | 5  |
| com.daily.zodiac.signs.horoscope.palmistry  | Zodiac Signs Master - Palmistry & Horoscope 2019   | 14 | 2 | 5  |
| com.rovio.angrybirds                        | Angry Birds Classic                                | 13 | 1 | 10 |
| com.cocoplay.erpetvet                       | Doctor Fluff Pet Vet                               | 13 | 2 | 9  |
| es.socialpoint.DragonCity                   | Dragon City                                        | 13 | 2 | 5  |
| com.hitcents.drawastickmanepic2free         | Draw a Stickman: EPIC 2 Free                       | 13 | 2 | 12 |
| com.playrix.homescapes                      | Homescapes                                         | 13 | 2 | 12 |
| kjv.bible.kingjamesbible                    | King James Bible (KJV) - Free Bible Verses + Audio | 13 | 2 | 6  |
| com.azurgames.BattleGroundRoyale            | PIXEL'S UNKNOWN BATTLE GROUND                      | 13 | 2 | 8  |
| net.peakgames.toonblast                     | Toon Blast                                         | 13 | 2 | 5  |
| com.bitmango.go.wheresmyavocadoadodrawlines | Where's My Avocado? Draw lines                     | 13 | 2 | 8  |
| com.sinyee.babybus.digging                  | Baby Panda's Treasure Island                       | 12 | 2 | 11 |
| com.rr.carrace                              | Mega Ramp Car Racing Impossible Stunts             | 12 | 2 | 11 |
| com.bfs.ninjump                             | NinJump                                            | 12 | 5 | 6  |
| com.hulu.plus                               | Hulu: Stream TV, Movies & more                     | 11 | 2 | 9  |
| com.sinyee.babybus.digestion                | Baby Panda's Body Adventure                        | 11 | 1 | 8  |

|                                                 |                                                |    |   |    |
|-------------------------------------------------|------------------------------------------------|----|---|----|
| com.sinyee.babybus.toilet                       | Baby Panda's Potty Training - Toilet Time      | 11 | 1 | 8  |
| com.mmarcel.cnb2                                | Crafting and Building                          | 11 | 1 | 9  |
| com.photoappworld.cut.paste.photo               | Cut and Paste Photos                           | 11 | 1 | 7  |
| com.playcreek.DeathWorm_Free                    | Death Worm™ Free                               | 11 | 2 | 7  |
| com.dobsoftstudios.gunfustickman2               | Gun Fu: Stickman 2                             | 11 | 2 | 9  |
| com.chateaustudios.sanicclickmaniaAndroid       | Sanic Clicker Maniiia : Tap Adventure          | 11 | 2 | 8  |
| com.sportsgame.stuntmotoracing.free             | Stunt Moto Racing                              | 11 | 2 | 11 |
| net.mobigame.zombietsunami                      | Zombie Tsunami                                 | 11 | 3 | 8  |
| com.tabtale.nailfiasco                          | Candy Nail Art - Sweet Fashion                 | 10 | 2 | 4  |
| air.com.sgn.cookiejam.gp                        | Cookie Jam - Match 3 Games & Free Puzzle Game  | 10 | 2 | 4  |
| com.greenteagames.dogracing3d                   | Dog Run - Pet Dog Simulator                    | 10 | 2 | 8  |
| flipboard.app                                   | Flipboard: News For Our Time                   | 10 | 2 | 8  |
| com.beansprites.rainbowicecream.popsiclesFREE   | Ice Cream & Popsicles - Yummy Ice Cream Free   | 10 | 2 | 7  |
| com.kauf.monstertruckracinghero3d               | Monster Truck Racing Hero 3D by Kaufcom        | 10 | 2 | 6  |
| eu.bandainamcoent.pacman256                     | PAC-MAN 256 - Endless Maze                     | 10 | 2 | 7  |
| com.gameone.superadventuresofjabber.free        | Super Adventures of Jabber                     | 9  | 1 | 9  |
| com.sinyee.babybus.homesafe.global              | Baby Panda Home Safety                         | 9  | 1 | 8  |
| com.amayasoft.cars.kids.toddlercars.garage.game | Car game for toddlers - kids cars racing games | 9  | 2 | 6  |
| super.smash.world.bros                          | Sboy World Adventure 2018                      | 9  | 1 | 7  |
| com.strawdogstudios.simonscatcrunchtime         | Simon's Cat - Crunch Time                      | 9  | 2 | 6  |
| com.tutotoons.app.sweetbabygirlsummercamp.free  | Sweet Baby Girl Summer Camp                    | 9  | 2 | 3  |

|                                               |                                                    |   |   |   |
|-----------------------------------------------|----------------------------------------------------|---|---|---|
| com.contextlogic.wish                         | Wish - Shopping Made Fun                           | 9 | 5 | 5 |
| com.freeBabyGames.balloonPopKids              | Balloon Pop Kids Learning Game Free for babies     | 8 | 2 | 6 |
| com.budgetstudios.HelloKittyNailSalon         | Hello Kitty Nail Salon                             | 8 | 2 | 7 |
| com.zeptolab.cats.google                      | CATS: Crash Arena Turbo Stars                      | 8 | 2 | 5 |
| de.pictofun.labyrinthone                      | Classic Labyrinth 3d Maze - free games             | 8 | 2 | 6 |
| com.impp.motorbike.megaramp.jump              | Impossible Mega Ramp Moto Bike Rider Superhero Car | 8 | 2 | 6 |
| com.brokenreality.planemerger.android         | Merge Plane - Click & Idle Tycoon                  | 8 | 2 | 6 |
| com.mobileposse.client                        | metroZONE                                          | 8 | 7 | 2 |
| com.pixel.gun3d                               | Pixel Gun 3D: Shooting games & Battle Royale       | 8 | 2 | 7 |
| com.vcast.mediamanager                        | Verizon Cloud                                      | 8 | 3 | 2 |
| com.YovoGames.dentist                         | Children's doctor: dentist                         | 7 | 2 | 5 |
| com.oki.alphabetnew                           | ABCD for kids - ABC Learning games for toddlers    | 7 | 2 | 4 |
| com.avg.cleaner                               | AVG Cleaner - Speed, Battery, Memory & RAM Booster | 7 | 1 | 3 |
| jackhil.pixel.art.masks.color.number          | Color By Number Pixel Art Moonlight Hero           | 7 | 2 | 6 |
| com.gonoodle.gonoodle                         | GoNoodle - Kid Movement & Mindfulness Videos!      | 7 | 1 | 2 |
| com.google.android.music                      | Google Play Music                                  | 7 | 4 | 3 |
| brilliant.sari                                | Kids Brain Trainer (Preschool)                     | 7 | 1 | 6 |
| com.tutotoons.app.kikififipetbeautysalon.free | Kiki & Fifi Pet Beauty Salon - Haircut & Makeup    | 7 | 2 | 3 |
| com.mcdonalds.app                             | McDonald's                                         | 7 | 5 | 4 |
| com.stickwar.legend                           | Stickman War: Beyond Legendary                     | 7 | 2 | 6 |
| com.ioplayjoy.stickmansuperme                 | Stickman.io Superme                                | 7 | 2 | 7 |
| com.edujoy.toddler.games                      | Toddler & Baby Games                               | 7 | 1 | 6 |

|                                                    |                                                       |   |   |   |
|----------------------------------------------------|-------------------------------------------------------|---|---|---|
| com.knights.bikesstunt.motomas<br>ter              | Bike Stunt race Master 3d<br>Racing - New Free Games  | 6 | 2 | 5 |
| com.blippar.ar.android                             | Blippar - The Augmented<br>Reality browser            | 6 | 3 | 4 |
| com.king.candycrushjellysaga                       | Candy Crush Jelly Saga                                | 6 | 3 | 3 |
| com.crazylabs.coin.rush                            | Coin Rush!                                            | 6 | 2 | 5 |
| com.dodreams.driveaheadsports                      | Drive Ahead! Sports                                   | 6 | 2 | 6 |
| com.myhomescreen.email                             | Email Home - Full Screen<br>Email Widget and Launcher | 6 | 2 | 5 |
| com.aa.extreme.city.gt.car.stunts                  | Extreme City GT Car Stunts                            | 6 | 2 | 5 |
| com.wikia.singlewikia.sonic                        | FANDOM for: Sonic                                     | 6 | 2 | 4 |
| com.funpop.android_hatch                           | Hatch Baby Animal- Hatch<br>Egg Spa Salon             | 6 | 2 | 4 |
| com.superplusgames.hosandroid                      | Hills of Steel                                        | 6 | 2 | 5 |
| zok.android.numbers                                | Kids Numbers and Math<br>FREE                         | 6 | 2 | 2 |
| com.bigbluebubble.msm2                             | My Singing Monsters:<br>Dawn of Fire                  | 6 | 2 | 4 |
| com.babymariagames.puppypetd<br>aycare             | Puppy Pet Daycare                                     | 6 | 1 | 5 |
| com.ffgames.racingincar2                           | Racing in Car 2                                       | 6 | 2 | 3 |
| com.gameone.jabbersuperjump2.<br>free              | Super Jabber Jump 2                                   | 6 | 2 | 6 |
| com.gi.talkinggummybear                            | Talking Gummy Bear Free                               | 6 | 2 | 5 |
| com.outfit7.talkingpierrefree                      | Talking Pierre the Parrot                             | 6 | 3 | 4 |
| com.xfinity.cloudtvr                               | Xfinity Stream                                        | 6 | 4 | 2 |
| mobi.abcmouse.academy_goo                          | ABC Mouse.com                                         | 5 | 2 | 4 |
| com.kiloo.subwaysurf                               | Subway Surfers                                        | 5 | 2 | 4 |
| com.king.candycrushsodasaga                        | Candy Crush Soda Saga                                 | 5 | 3 | 2 |
| com.pandora.android                                | Pandora Music                                         | 5 | 2 | 3 |
| com.disney.datg.videoplatforms.<br>android.watchdc | DisneyNOW - Episodes &<br>Live TV                     | 5 | 2 | 4 |
| com.namcobandaigames.pacman<br>tournaments         | PAC-MAN                                               | 5 | 2 | 4 |
| forqan.tech.babypuzzles_dinosa<br>urs.ads          | Dinosaurs Puzzles for Kids<br>- FREE                  | 5 | 1 | 4 |
| com.apocafistteam.games                            | Hatchimals surprise eggs                              | 5 | 2 | 4 |

|                                                  |                                                   |   |   |   |
|--------------------------------------------------|---------------------------------------------------|---|---|---|
| com.getsomeheadspace.android                     | Headspace: Meditation & Sleep                     | 5 | 1 | 4 |
| com.greysprings.kindergarten8                    | Kindergarten Kids Learning: Fun Educational Games | 5 | 2 | 3 |
| com.lipalearning.lipazoo.game                    | Lipa Zoo                                          | 5 | 3 | 2 |
| com.microsoft.emmx                               | Microsoft Edge                                    | 5 | 3 | 4 |
| com.microsoft.office.outlook                     | Microsoft Outlook                                 | 5 | 2 | 2 |
| com.tutotoons.app.pandalubabybearcare2.free      | Panda Lu Baby Bear Care                           | 5 | 2 | 2 |
| com.pbs.video                                    | PBS Video                                         | 5 | 2 | 3 |
| com.ea.game.pvz2_na                              | Plants vs. Zombies 2 FREE                         | 5 | 2 | 3 |
| air.com.tutotoons.app.powergirlssupercity.free   | Power Girls Super City - Superhero Salon & Pets   | 5 | 2 | 3 |
| com.world3dgames.rushKartRacing                  | Rush Kart Racing 3D                               | 5 | 2 | 4 |
| com.dingogames.tastyplanet4                      | Tasty Planet Forever                              | 5 | 2 | 2 |
| com.amctv.thewalkingdead.deadyourself            | The Walking Dead Dead Yourself                    | 5 | 3 | 3 |
| com.tinybeans                                    | Tinybeans Family Album, Babby Book, Photo Journal | 5 | 2 | 4 |
| com.outfit7.tomslovelettersfree                  | Tom's Love Letters                                | 5 | 3 | 4 |
| com.amazon.avod.thirdpartyclient                 | Amazon Prime Video                                | 4 | 2 | 3 |
| com.king.candycrushsaga                          | Candy Crush Saga                                  | 4 | 3 | 2 |
| com.tutotoons.app.cathairsalonbirthdayparty.free | Cat Hair Salon Birthday Party                     | 4 | 2 | 2 |
| com.pjmasksmoonlightheroes                       | PJ Masks: Moonlight Heroes                        | 4 | 2 | 3 |
| com.sagosago.ConstructionWinter.googleplay.free  | Sago Mini Holiday Trucks and Diggers              | 4 | 2 | 2 |
| com.threed.bowling                               | 3D Bowling                                        | 4 | 3 | 4 |
| mobi.abcmouse.mrt.google                         | ABCmouse Magic Rainbow Traceables                 | 4 | 2 | 3 |
| com.rovio.baba                                   | Angry Birds 2                                     | 4 | 2 | 3 |
| com.jiubang.alock                                | AppLock                                           | 4 | 2 | 4 |
| com.hiddenvariable.bagit                         | Bag it!                                           | 4 | 2 | 2 |

|                                                      |                                                 |   |   |   |
|------------------------------------------------------|-------------------------------------------------|---|---|---|
| com.mattel.barbiesparkleblastkids                    | Barbie Fashion Closet                           | 4 | 2 | 3 |
| com.disney.cars3_goo                                 | Cars: Lightning League                          | 4 | 1 | 4 |
| com.scarydudes.green.grandpa.alien                   | Grandpa Alien Escape Game                       | 4 | 2 | 3 |
| com.spinmaster.enterprise.colleggtibles              | Hatchimals COLLEGGtibles                        | 4 | 2 | 3 |
| com.mobirix.throwball                                | Hit & Knock down                                | 4 | 2 | 3 |
| air.mobi.ka.platform.gp.cont1.free                   | Kids Academy: Talented & Gifted                 | 4 | 4 | 1 |
| com.lookout                                          | Lookout Security & Antivirus                    | 4 | 2 | 2 |
| com.mojang.minecraftpe                               | Minecraft                                       | 4 | 3 | 2 |
| com.TWCableTV                                        | Spectrum TV                                     | 4 | 2 | 2 |
| com.mtvn.superbrawlapp                               | Super Brawl Universe                            | 4 | 2 | 1 |
| air.com.spilgames.TrollFaceQuestVideoGames2          | Troll Face Quest: Video Games 2 - Tricky Puzzle | 4 | 2 | 3 |
| com.rvappstudios.abc_kids_toddler_tracing_phonics    | ABC Kids - Tracing & Phonics                    | 3 | 2 | 2 |
| com.disney.docmcstuffinsbaby_goo                     | Doc McStuffins: Baby Nursery                    | 3 | 2 | 2 |
| com.rvappstudios.shapes.colors.toddler               | Colors & Shapes - Kids Learn color and Shape    | 3 | 2 | 2 |
| com.roblox.client                                    | Roblox                                          | 3 | 2 | 3 |
| com.rvappstudios.numbers123.toddler.counting.tracing | 123 Numbers - Count & Tracing                   | 3 | 2 | 2 |
| com.google.android.videos                            | Google Play Movies & TV                         | 3 | 3 | 2 |
| org.lds.ldssa                                        | Gospel Library                                  | 3 | 3 | 1 |
| dk.spatifo.dublo                                     | LEGO DUPLO Town                                 | 3 | 2 | 2 |
| co.happybits.marcopolo                               | Marco Polo Video Walkie Talkie                  | 3 | 2 | 3 |
| com.sagosago.Friends.googleplay                      | Sago Mini Friends                               | 3 | 1 | 3 |
| com.rvappstudios.abc.spelling.toddler.spell.phonics  | ABC Spelling - Spell & Phonics                  | 3 | 2 | 2 |
| com.nintendo.zaca                                    | Animal Crossing: Pocket Camp                    | 3 | 1 | 3 |

|                                                    |                                                    |   |   |   |
|----------------------------------------------------|----------------------------------------------------|---|---|---|
| kr.co.smartstudy.babysharkrun_android_googlemarket | Baby Shark RUN                                     | 3 | 2 | 3 |
| com.mobirix.swipebrick2                            | Bricks Breaker Quest                               | 3 | 1 | 3 |
| com.bubadu.bubbu                                   | Bubbu - My Virtual Pet                             | 3 | 1 | 3 |
| se.appfamily.puzzle.christmas.free                 | Christmas Jigsaw Puzzles Game - Kids & Adults      | 3 | 1 | 3 |
| com.roblox.cookie.dolls.swirl.surprise.videos.game | Crazy Cookie The Roblox Swirl: dolls adventures    | 3 | 2 | 2 |
| com.peacock.flashlight                             | Flashlight                                         | 3 | 2 | 2 |
| com.playdemic.golf.android                         | Golf Clash                                         | 3 | 2 | 2 |
| kids.doodle.best.photo.apps                        | Kids Doodle                                        | 3 | 1 | 3 |
| com.intellijoy.counting                            | Kids Learn to Count 123                            | 3 | 2 | 2 |
| com.game.flippy.knife.challenge                    | Knife 3D Game Challenge                            | 3 | 2 | 2 |
| com.lipalearning.lipatrain.game                    | Lipa Train                                         | 3 | 3 | 2 |
| com.educastudio.marbelmewarnai                     | Marbel Kids Coloring Books                         | 3 | 2 | 2 |
| com.microsoft.office.onenote                       | Microsoft OneNote                                  | 3 | 1 | 3 |
| com.kigle.project.poli.habit                       | Poli Habit Game                                    | 3 | 2 | 2 |
| com.rvappstudios.jigsaw.puzzles.kids               | Puzzle Kids - Animals Shapes and Jigsaw Puzzles    | 3 | 2 | 2 |
| net.promediastudio.royalgirlspriincesssalon        | Royal Girls - Princess Salon                       | 3 | 2 | 2 |
| com.moose.shopville                                | Shopkins World!                                    | 3 | 2 | 2 |
| com.vitotechnology.StarWalk2Free                   | Star Walk 2 Free - Identify Stars in the Night Sky | 3 | 2 | 2 |
| com.touchmechanics.strike                          | Strike! Ten Pin Bowling                            | 3 | 1 | 3 |
| com.creaforkids.surpriseeggsgumballmachinekids     | Surprise Eggs GumBall Machine                      | 3 | 2 | 2 |
| com.imangi.templerun2                              | Temple Run 2                                       | 3 | 1 | 3 |
| com.outfit7.tomlovesangelafree                     | Tom Loves Angela                                   | 3 | 3 | 2 |
| com.kidscape.king                                  | Touch Lock - disable screen and all keys           | 3 | 1 | 3 |
| air.com.spilgames.TrollFaceQuestHorror             | Troll Face Quest: Horror                           | 3 | 2 | 2 |
| com.craftgames.worldcraft                          | WorldCraft: 3D Build & Craft                       | 3 | 2 | 2 |

|                                         |                                                    |   |   |   |
|-----------------------------------------|----------------------------------------------------|---|---|---|
| com.turner.gumballbkom                  | Wrecker's Revenge - Gumball                        | 3 | 2 | 3 |
| com.facebook.orca                       | Messenger: Text and Video Chat for Free            | 2 | 2 | 1 |
| com.nianticlabs.pokemongo               | Pokemon GO                                         | 2 | 2 | 2 |
| com.robtopx.geometrydashsubzero         | Geometry Dash SubZero                              | 2 | 1 | 2 |
| com.facebook.talk                       | Messenger Kids - Safer Messaging and Video chat    | 2 | 2 | 1 |
| mobi.abcmouse.mathmastery.google        | ABCmouse Mastering Math                            | 2 | 1 | 2 |
| mobi.abcmousemv.academy_google          | ABCmouse Music Videos                              | 2 | 1 | 2 |
| com.amazon.kindle                       | Amazon Kindle                                      | 2 | 1 | 2 |
| com.drivemode                           | AT&T DriveMode                                     | 2 | 2 | 1 |
| com.bubadu.buildergame                  | Builder Game                                       | 2 | 1 | 2 |
| com.cec.skateuniverse                   | Chuck E.'s Skate Universe                          | 2 | 1 | 1 |
| com.cocoplay.cocoiceprincess_googleplay | Coco Ice Princess                                  | 2 | 2 | 1 |
| com.google.android.apps.books           | Google Play Books - Ebooks, Audiobooks, and Comics | 2 | 2 | 2 |
| com.google.android.talk                 | Hangouts                                           | 2 | 2 | 1 |
| com.hoopladigital.android               | Hoopla Digital                                     | 2 | 2 | 1 |
| com.internetdesignzone.nurseryrhymes    | KidloLand- Nursery Rhymes, Kids Games, Baby Songs  | 2 | 2 | 2 |
| com.alldigital.android.livingscriptures | Living Scriptures                                  | 2 | 2 | 1 |
| com.AndroidA.MediaConverter             | Media Converter                                    | 2 | 1 | 1 |
| com.bubadu.mybabycare                   | My Baby Care                                       | 2 | 1 | 2 |
| com.babyfirsttv.peekaboo_i_see_you      | Peekaboo, I See You! for Kids                      | 2 | 2 | 1 |
| si.pilcom.apps.pizzamakerkids           | Pizza Maker - Cooking Game                         | 2 | 1 | 2 |
| me.pou.app                              | Pou                                                | 2 | 1 | 2 |
| com.tencent.ig                          | PUBG MOBILE                                        | 2 | 1 | 2 |

|                                           |                                                    |   |   |   |
|-------------------------------------------|----------------------------------------------------|---|---|---|
| com.FDGEEntertainment.redball4.gp         | Red Ball 4                                         | 2 | 2 | 1 |
| com.roku.remote                           | Roku                                               | 2 | 2 | 1 |
| com.samsung.smartviewad                   | Samsung Smart View                                 | 2 | 2 | 1 |
| com.smule.singandroid                     | Smule - The #1 Singing App                         | 2 | 1 | 2 |
| com.sega.sonicboomandroid                 | Sonic Dash 2: Sonic Boom                           | 2 | 2 | 1 |
| com.ammonite.spaceforgecardboard          | Spaceforge VR Google Cardboard                     | 2 | 2 | 2 |
| com.mstfbs.yesiluzayli                    | The gren alien dance                               | 2 | 1 | 2 |
| com.tocaboca.blocks                       | Toca Blocks                                        | 2 | 2 | 1 |
| com.tocaboca.tocacity                     | Toca Life: City                                    | 2 | 2 | 1 |
| com.tocaboca.tocalifeworld                | Toca Life: World                                   | 2 | 2 | 2 |
| com.UCMobile.intl                         | UC Browser - Video Downloader, Watch Video Offline | 2 | 1 | 2 |
| best.photo.app.unicornphoto               | Unicorn Photo                                      | 2 | 1 | 2 |
| com.verizon.messaging.vzmsgs              | Verizon Messages                                   | 2 | 2 | 1 |
| com.disney.wheresmywater2_go              | Where's My Water? 2                                | 2 | 1 | 2 |
| es.parrotgames.restaurantcity             | World Chef                                         | 2 | 2 | 1 |
| com.zenstudios.ZenPinball                 | Zen Pinball                                        | 2 | 1 | 2 |
| com.google.android.youtube                | YouTube                                            | 1 | 1 | 1 |
| com.tocaboca.tocakitchen2                 | Toca Kitchen 2                                     | 1 | 1 | 1 |
| com.kiddoware.kidsplace                   | Kids Place - Parental Control                      | 1 | 1 | 1 |
| imanimation.alisumaya                     | Ali and Sumaya: Let's Pray!                        | 1 | 1 | 1 |
| com.disney.djappisodesmmchr_goo           | Appisodes: Road Rally                              | 1 | 1 | 1 |
| com.demirm.bubble.popping.marine          | Bubble Popping for Babies FREE                     | 1 | 1 | 1 |
| com.YovoGames.carwash3                    | Car Wash - Monster Truck                           | 1 | 1 | 1 |
| com.mytona.cookingdiary.android           | Cooking Diary: Best Tasty Restaurant & Cafe Game   | 1 | 1 | 1 |
| com.playrix.fishdomdd.gplay               | Fishdom                                            | 1 | 1 | 1 |
| com.google.android.apps.docs.editors.docs | Google Docs                                        | 1 | 1 | 1 |

|                                                       |                                                    |   |   |   |
|-------------------------------------------------------|----------------------------------------------------|---|---|---|
| com.chartcross.gpstest                                | GPS Test                                           | 1 | 1 | 1 |
| com.bigbluebubble.singingmonsters.full                | My Singing Monsters                                | 1 | 1 | 1 |
| com.androidwasabi.livewallpaper.g2nightsky            | Night Sky Live Wallpaper                           | 1 | 1 | 1 |
| com.kidspaint.kaushalmehra.drawingfun                 | Paint Free - Drawing Fun                           | 1 | 1 | 1 |
| com.apptxx.ramp.car.racing                            | Ramp Car Stunts                                    | 1 | 1 | 1 |
| com.kiddoware.kidsafebrowser                          | Safe Browser Parental Control - Blocks Adult Sites | 1 | 1 | 1 |
| com.zakg.scaryteacher.hellgame                        | Scary Teacher 3D                                   | 1 | 1 | 1 |
| com.stingray.karaoke.smc                              | Singing Machine Karaoke                            | 1 | 1 | 1 |
| com.tocaboca.tocahairsalon3                           | Toca Hair Salon 3                                  | 1 | 1 | 1 |
| com.tocaboca.tocanature                               | Toca Nature                                        | 1 | 1 | 1 |
| com.tocaboca.tocapetdoctor                            | Toca Pet Doctor                                    | 1 | 1 | 1 |
| com.matteljv.uno                                      | UNO!                                               | 1 | 1 | 1 |
| air.com.pixelstudio8.venom.angry.crash.rush.io.online | Venom Angry Crashy Rush Online                     | 1 | 1 | 1 |
| com.google.android.apps.youtube.unplugged             | YouTube TV - Watch & Record Live TV                | 1 | 1 | 1 |
| com.openlattice.chronicle                             | Chronicle                                          | 0 | 0 | 0 |
| com.android.chrome                                    | Google Chrome: Fast & Secure                       | 0 | 0 | 0 |
| com.google.android.apps.youtube.kids                  | YouTube Kids                                       | 0 | 0 | 0 |
| com.google.android.googlequicksearchbox               | Google                                             | 0 | 0 | 0 |
| com.google.android.gms                                | Google Play Services                               | 0 | 0 | 0 |
| com.netflix.mediaclient                               | Netflix                                            | 0 | 0 | 0 |
| com.google.android.play.games                         | Google Play Games                                  | 0 | 0 | 0 |
| com.google.android.gm                                 | Gmail                                              | 0 | 0 | 0 |
| com.sec.android.app.sbrowser                          | Samsung Internet Browser                           | 0 | 0 | 0 |
| org.pbskids.gamesapp                                  | PBS KIDS Games                                     | 0 | 0 | 0 |
| org.pbskids.video                                     | PBS KIDS Video                                     | 0 | 0 | 0 |
| com.google.android.apps.docs                          | Google Drive                                       | 0 | 0 | 0 |
| com.outfit7.mytalkingtom2                             | My Talking Tom 2                                   | 0 | 0 | 0 |

|                                                               |                                                   |   |   |   |
|---------------------------------------------------------------|---------------------------------------------------|---|---|---|
| com.google.android.apps.photos                                | Google Photos                                     | 0 | 0 | 0 |
| com.facebook.katana                                           | Facebook                                          | 0 | 0 | 0 |
| com.google.android.apps.maps                                  | Google Maps                                       | 0 | 0 | 0 |
| com.lego.duplo.trains                                         | LEGO DUPLO Train                                  | 0 | 0 | 0 |
| com.lego.bricksmore                                           | LEGO Juniors Create & Cruise                      | 0 | 0 | 0 |
| com.happymeal.mcplay                                          | McPlay                                            | 0 | 0 | 0 |
| com.budgestudios.googleplay.MyLittlePonyRainbowRunners        | My Little Pony Rainbow Runners                    | 0 | 0 | 0 |
| com.nick.android.nickjr                                       | Nick Jr. - Shows & Games                          | 0 | 0 | 0 |
| io.voodoo.paper2                                              | Paper.io 2                                        | 0 | 0 | 0 |
| com.snapchat.android                                          | Snapchat                                          | 0 | 0 | 0 |
| com.budgestudios.googleplay.StrawberryShortcakeIceCreamIsland | Strawberry Shortcake Ice Cream Island             | 0 | 0 | 0 |
| com.teachyourmonstertoread.tmapp                              | Teach Your Monster to Read - Phonics and Reading  | 0 | 0 | 0 |
| com.powernapps.acallfromsanta                                 | A Call From Santa Claus!                          | 0 | 0 | 0 |
| com.sinyee.babybus.tailor                                     | Baby Panda's Fashion Dress Up Game                | 0 | 0 | 0 |
| com.google.android.deskclock                                  | Clock                                             | 0 | 0 | 0 |
| com.play.dino.jurassic.world.app                              | Dinosaurs Hunter                                  | 0 | 0 | 0 |
| flipboard.boxer.app                                           | Flipboard Briefing                                | 0 | 0 | 0 |
| se.appfamily.dinoadventure                                    | Kids Dino Adventure Game - Free Game for Children | 0 | 0 | 0 |
| com.lego.superheroes.dccomics.mightymicros                    | LEGO DC Mighty Micros                             | 0 | 0 | 0 |
| com.razmobi.monstertrucks2                                    | Monster Trucks Game for Kids 2                    | 0 | 0 | 0 |
| com.bandainamcoent.google.pac.ralph                           | PAC-MAN: Ralph Breaks the Maze                    | 0 | 0 | 0 |
| com.samsung.oh                                                | Samsung Members                                   | 0 | 0 | 0 |
| air.com.hypah.io.slither                                      | slither.io                                        | 0 | 0 | 0 |
| com.sega.soniccd.classic                                      | Sonic CD Classic                                  | 0 | 0 | 0 |
| com.sega.sonic4episode2                                       | Sonic The Hedgehog 4 Episode II                   | 0 | 0 | 0 |

|                                                    |                                                    |   |   |   |
|----------------------------------------------------|----------------------------------------------------|---|---|---|
| com.pablo.gallegoFalcon.PDLNormalES                | Spanish Lucas' Whiteboard                          | 0 | 0 | 0 |
| com.budgetstudios.googleplay.ThomasAndFriendsMinis | Thomas & Friends Minis                             | 0 | 0 | 0 |
| com.ction.playergames                              | 2 3 4 Player Mini Games                            | 0 | 0 | 0 |
| com.iabuzz.apk.p4kall                              | 384 Puzzles for Preschool Kids                     | 0 | 0 | 0 |
| com.piano3d.piano.pianokeyboard                    | 3D Piano Keyboard                                  | 0 | 0 | 0 |
| com.foofoo.tracing                                 | ABC Tracing & Phonics Game for Kids & Preschoolers | 0 | 0 | 0 |
| com.sinyee.babybus.foodstuff                       | Baby Panda's Fruit Farm                            | 0 | 0 | 0 |
| com.budgetstudios.BarbieMagicalFashion             | Barbie Magical Fashion                             | 0 | 0 | 0 |
| com.oceanhouse_media.bookbbweloveourmom_app        | BB - We Love Our Mom                               | 0 | 0 | 0 |
| com.gamehivecorp.beattheboss4                      | Beat the Boss 4                                    | 0 | 0 | 0 |
| com.goodssofttech.puzzlesforkids                   | Bob - jigsaw puzzles free games for kids & parents | 0 | 0 | 0 |
| game.free.rise.hole.up.io.love.balls.toss.up       | Buddy Toss                                         | 0 | 0 | 0 |
| com.appear.cakeonfaceantistresses                  | Cake on face antistress                            | 0 | 0 | 0 |
| com.freegame.carsmasher                            | Car Smasher                                        | 0 | 0 | 0 |
| air.com.CaringForPuppySalon                        | Caring for puppy salon                             | 0 | 0 | 0 |
| com.turner.cnplay                                  | Cartoon Network Arcade                             | 0 | 0 | 0 |
| com.wonderfulgames.catthemedamusementparkfun       | Cat Theme & Amusement Park Fun                     | 0 | 0 | 0 |
| com.uilmedia.chasecraft                            | Chasecraft                                         | 0 | 0 | 0 |
| air.com.foxandsheep.chomp                          | CHOMP by Christoph Niemann                         | 0 | 0 | 0 |
| com.choochooapps.cboo                              | Choo Choo Boo                                      | 0 | 0 | 0 |
| com.choochooapps.cfarm                             | Choo Choo Farm                                     | 0 | 0 | 0 |
| com.orange.coloring.book.christmas.kids            | Christmas Coloring Book                            | 0 | 0 | 0 |
| classickong.retroclassic                           | classic kong                                       | 0 | 0 | 0 |
| com.naturalmotion.clumsyninja                      | Clumsy Ninja                                       | 0 | 0 | 0 |

|                                               |                                         |   |   |   |
|-----------------------------------------------|-----------------------------------------|---|---|---|
| com.orange.coloring.learn.kids                | Coloring & Learn                        | 0 | 0 | 0 |
| com.bimiboo.coloring                          | Coloring book for kids                  | 0 | 0 | 0 |
| com.kidscoloringbook.android                  | Coloring book moana                     | 0 | 0 | 0 |
| com.FDGEntertainment.CoverOrange2.gp          | Cover Orange: Journey                   | 0 | 0 | 0 |
| com.topgamestudio.CubeWarsBattlefieldSurvival | Cube Wars Battle Survival               | 0 | 0 | 0 |
| com.km.cutpaste.util                          | Cut Paste Photos                        | 0 | 0 | 0 |
| com.appama.dinosaurmatchinggame               | Dinosaur Matching Game for Kid          | 0 | 0 | 0 |
| air.com.thirdsense.eggyWords100HD             | Eggy 100 HD                             | 0 | 0 | 0 |
| com.elephanthead.elephantlearning             | Elephant Learning Math Academy          | 0 | 0 | 0 |
| com.originatorkids.EndlessAlphabet            | Endless Alphabet                        | 0 | 0 | 0 |
| com.hasbro.MLPegWorldENTERPRISE               | Equestria Girls                         | 0 | 0 | 0 |
| com.NikSanTech.FireDots3D                     | Fire Balls 3D                           | 0 | 0 | 0 |
| org.mozilla.firefox                           | Firefox Browser fast & private          | 0 | 0 | 0 |
| com.duckduckmoosedesign.fish                  | Fish School by Duck Duck Moose          | 0 | 0 | 0 |
| com.AppKingdom.fivemonkeys videos             | Five Little Monkeys Videos              | 0 | 0 | 0 |
| com.google.android.apps.kids.familylink       | Google Family Link for parents          | 0 | 0 | 0 |
| com.google.android.apps.kids.familylinkhelper | Google Family Link for children & teens | 0 | 0 | 0 |
| com.google.android.keep                       | Google Keep                             | 0 | 0 | 0 |
| com.google.android.apps.paidtasks             | Google Opinion Rewards                  | 0 | 0 | 0 |
| air.com.bmapps.gossipgirlsdivasinhighschool   | Gossip Girl Divas in Highschool         | 0 | 0 | 0 |
| com.DrHackAndMatrixDeveloper.grandson         | Grandson                                | 0 | 0 | 0 |
| com.green.alien.dance.button                  | Green alien dance button                | 0 | 0 | 0 |
| com.futureplay.boots                          | Idle Farming Empire                     | 0 | 0 | 0 |

|                                                            |                                                    |   |   |   |
|------------------------------------------------------------|----------------------------------------------------|---|---|---|
| air.com.bmapps.injureddolphincare                          | Injured Dolphin Care                               | 0 | 0 | 0 |
| org.jw.jwlibrary.mobile                                    | JW Library                                         | 0 | 0 | 0 |
| com.playgendary.ktb2                                       | Kick the Buddy: Forever                            | 0 | 0 | 0 |
| com.learninga_z.onyourown                                  | Kids A-Z                                           | 0 | 0 | 0 |
| se.appfamily.balloonpopfree                                | Kids Balloon Pop Game Free                         | 0 | 0 | 0 |
| com.extwebtech.kidslearningplanet                          | Kids Preschool                                     | 0 | 0 | 0 |
| com.CoolAwesomeFun.KidsRacing                              | Kids Racing - FunRacecar Game For Boys And Girls   | 0 | 0 | 0 |
| air.fisherprice.com.Puppy                                  | Learning Letters Puppy                             | 0 | 0 | 0 |
| com.lightbot.lightbot                                      | Lightbot: Programming Puzzles                      | 0 | 0 | 0 |
| air.com.winkypinky.babybellabraidhairstalon                | Little Bella Braided Hair Salon                    | 0 | 0 | 0 |
| com.sinyee.babybus.village                                 | Little Panda's Dream Town                          | 0 | 0 | 0 |
| com.facebook.mlite                                         | Messenger Lite: Free Calls & Messages              | 0 | 0 | 0 |
| com.SlidePuzzle                                            | Minecraft Portals Puzzle for fun                   | 0 | 0 | 0 |
| com.telltalegames.minecraft100                             | Minecraft: Story Mode                              | 0 | 0 | 0 |
| com.appblockgames.freecraftexploration                     | MOD-MASTER for Minecraft PE (Pocket Edition) Free  | 0 | 0 | 0 |
| com.speedygtgames.motorcyclescapesimulatorformulacarpolice | motorcycle Escape Simulator; Formular Car - Police | 0 | 0 | 0 |
| com.tutotoons.app.mybabyunicorn.free                       | My Baby Unicorn - Virtual Pony Pet Care & Dress Up | 0 | 0 | 0 |
| com.gameloft.android.ANMP.GloftPOHM                        | MY LITTLE PONY: Magic Princess                     | 0 | 0 | 0 |
| com.symantec.applock                                       | Norton App Lock                                    | 0 | 0 | 0 |
| air.org.pbskids.playandlearn                               | PBS Parents play & Learn                           | 0 | 0 | 0 |
| air.com.pepiplay.pelitree                                  | Pepi Tree                                          | 0 | 0 | 0 |
| air.com.peppapig.activitymaker                             | Peppa Pig: Activity Maker                          | 0 | 0 | 0 |
| air.com.peppapig.paintbox                                  | Peppa Pig: Paintbox                                | 0 | 0 | 0 |
| com.vacuapps.jellify                                       | Photos Alive - Jellify                             | 0 | 0 | 0 |

|                                                   |                                           |   |   |   |
|---------------------------------------------------|-------------------------------------------|---|---|---|
| com.custom.pickmeup                               | Pick Me Up                                | 0 | 0 | 0 |
| kr.co.smartstudy.babyshark_android_googlemarket   | Pinkfong Baby Shark                       | 0 | 0 | 0 |
| com.pjmask.web                                    | PJ Masks: HQ                              | 0 | 0 | 0 |
| com.playmobil.ghostbusters                        | PLAYMOBIL Ghostbusters™                   | 0 | 0 | 0 |
| com.tellurionmobile.realmcraft                    | RealmCraft with Skins Export to Minecraft | 0 | 0 | 0 |
| com.gamepig.rush                                  | Rolling Balls                             | 0 | 0 | 0 |
| com.sagosago.ForestFlyer.googleplay               | Sago Mini Forest Flyer                    | 0 | 0 | 0 |
| com.sagosago.SpaceExplorer.googleplay             | Sago Mini Space Explorer                  | 0 | 0 | 0 |
| com.sagosago.FairyTales.googleplay                | Sago Mini Fairy Tales                     | 0 | 0 | 0 |
| com.sec.android.app.shealth                       | Samsung Health                            | 0 | 0 | 0 |
| smellymoo.sand                                    | sand:box - relaxing particle engine       | 0 | 0 | 0 |
| com.wb.goog.scribblremix                          | Scribblenauts Remix                       | 0 | 0 | 0 |
| air.Mark.MemoryGameForKids                        | Simon Says Memory Game                    | 0 | 0 | 0 |
| com.simplemobiletools.draw                        | Simple Draw                               | 0 | 0 | 0 |
| com.adsk.sketchbook                               | SketchBook: draw and paint                | 0 | 0 | 0 |
| com.samsung.android.oneconnect                    | SmartThings (Samsung Connect)             | 0 | 0 | 0 |
| ru.brothersappsandgames.smashdiyslimesfidgetslimy | Smash Diy Slime - Fidget Slimy            | 0 | 0 | 0 |
| air.com.starfall.more                             | Starfall Free & Member                    | 0 | 0 | 0 |
| com.darkarrow.stickfighter.saiyan                 | Stick Shadow: War Fight                   | 0 | 0 | 0 |
| com.maxgames.stickwarlegacy                       | Stick War: Legacy                         | 0 | 0 | 0 |
| com.mindy.grapl                                   | Stickman Hook                             | 0 | 0 | 0 |
| air.ie.capture.fisherprice3                       | Storybook Rhymes Volume 3                 | 0 | 0 | 0 |
| com.budgetstudios.StrawberryShortcakeBakeShare    | Strawberry Shortcake Bake Shop            | 0 | 0 | 0 |
| com.tutotoons.app.sweetbabygirlnewborn2.free      | Sweet Baby Girl Newborn 2                 | 0 | 0 | 0 |
| com.synthesia.synthesia                           | Synthesia                                 | 0 | 0 | 0 |

|                                              |                                                  |   |   |   |
|----------------------------------------------|--------------------------------------------------|---|---|---|
| com.imangi.templerun                         | Temple Run                                       | 0 | 0 | 0 |
| com.budgetstudios.ThomasAndFriendsGoGoThomas | Thomas & Friends: Go Go Thomas                   | 0 | 0 | 0 |
| com.bimiboo.playandlearn                     | Toddler games for 2-5 year olds                  | 0 | 0 | 0 |
| br.com.tapps.toiletttime                     | Toilet Time - Minigames to Kill Bathroom Boredom | 0 | 0 | 0 |
| io.mrarm.mctoolbox                           | Toolbox for Minecraft: PE                        | 0 | 0 | 0 |
| com.orionsmason.trainpuzzle                  | Train Games for Kids- Puzzles                    | 0 | 0 | 0 |
| com.tronrider                                | Tron Racer                                       | 0 | 0 | 0 |
| com.duckduckmoosedesign.trucks               | Trucks by Duck Duck Moose                        | 0 | 0 | 0 |
| com.perfectedtech.tumblebooks                | Tumblebooks                                      | 0 | 0 | 0 |
| org.videolan.vlc                             | VLC for Android                                  | 0 | 0 | 0 |
| com.water.surfingrace.motorbike.stunt        | Water Surfing motorbike Stunt                    | 0 | 0 | 0 |
| com.duckduckmoosedesign.bus                  | Wheels on the Bus                                | 0 | 0 | 0 |
| com.oceanhouse_media.bookclwhenigrowup_app   | When I Grow Up                                   | 0 | 0 | 0 |
| com.ttqq.wild.west.craft.creative.survival   | Wild West Craft - Mini West World                | 0 | 0 | 0 |

<sup>a</sup>Information sorted by number of transmissions, high to low.

**eTable 2. Transmission and Domain Counts by DFF Status and App Popularity**

| <b>Data Variable</b> | <b>Transmission Count<br/>Median [IQR]</b> | <b>Domain Count<br/>Median [IQR]</b> | <b>Unique Data Types<br/>Median [IQR]</b> |
|----------------------|--------------------------------------------|--------------------------------------|-------------------------------------------|
| DFF Status           |                                            |                                      |                                           |
| In DFF               | 1.0 [0-5]***                               | 1.0 [0-3]***                         | 1.0 [0-2]***                              |
| Not in DFF           | 4.0 [0-14]                                 | 3.0 [0-9]                            | 2.0 [0-2]                                 |
| Popularity Status    |                                            |                                      |                                           |
| Top 10%              | 0 [0-5]**                                  | 0 [0-3]**                            | 0 [0-2]*                                  |
| Bottom 90%           | 3.0 [0-10]                                 | 2.0 [0-6]                            | 2.0 [0-2]                                 |

Bivariate associations: \*\*\*p <.001, \*\*p<.01, \*p<.05, †p<.20

**eTable 3. Top 50 Most Common Third-Party Domains to Which Identifiers Were Transmitted by Apps Analyzed in the Current Study**

| <b>domain</b>                         | <b>Number of persistent identifier transmissions</b> | <b>Number of unique apps</b> | <b>Researcher notes re: type of domain based on website review</b>                                         |
|---------------------------------------|------------------------------------------------------|------------------------------|------------------------------------------------------------------------------------------------------------|
| graph.facebook.com                    | 103                                                  | 103                          | "Object information" (about individual users) and marketing                                                |
| config.uca.cloud.unity3d.com          | 86                                                   | 83                           | Advertising                                                                                                |
| auction.unityads.unity3d.com          | 103                                                  | 79                           | Advertising                                                                                                |
| publisher-config.unityads.unity3d.com | 83                                                   | 79                           | Advertising                                                                                                |
| cdp.cloud.unity3d.com                 | 138                                                  | 73                           | Game hosting platform, has ad services                                                                     |
| logs.supersonic.com                   | 51                                                   | 45                           | Advertising                                                                                                |
| t.appsflyer.com                       | 84                                                   | 44                           | Marketing analytics                                                                                        |
| live.chartboost.com                   | 125                                                  | 43                           | In-app monetization and ads                                                                                |
| rv-gateway.supersonicads.com          | 44                                                   | 42                           | Advertising                                                                                                |
| adc3-launch.adcolony.com              | 71                                                   | 40                           | Advertising                                                                                                |
| outcome.supersonicads.com             | 49                                                   | 38                           | Advertising and app monetization                                                                           |
| wd.adcolony.com                       | 48                                                   | 37                           | Advertising                                                                                                |
| settings.crashlytics.com              | 61                                                   | 34                           | App analytics - crashing, growth, retention, engagement                                                    |
| ads30.adcolony.com                    | 41                                                   | 34                           | Advertising                                                                                                |
| ecommerce.iap.unity3d.com             | 34                                                   | 34                           | Advertising                                                                                                |
| is-gateway.supersonicads.com          | 41                                                   | 32                           | Advertising                                                                                                |
| api.vungle.com                        | 33                                                   | 30                           | Ads/monetization                                                                                           |
| init.supersonicads.com                | 33                                                   | 30                           | Advertising                                                                                                |
| ws.tapjoyads.com                      | 53                                                   | 27                           | Advertising                                                                                                |
| connect.tapjoy.com                    | 51                                                   | 27                           | Advertising                                                                                                |
| app.adjust.com                        | 32                                                   | 27                           | Measures mobile marketing, integrates with over 2000 ad networks for "granular insights" across platforms. |
| rpc.tapjoy.com                        | 58                                                   | 26                           | Advertising                                                                                                |
| ads.api.vungle.com                    | 26                                                   | 26                           | Ads/monetization                                                                                           |
| placements.tapjoy.com                 | 57                                                   | 24                           | Advertising                                                                                                |
| ads.mopub.com                         | 34                                                   | 23                           | Advertising                                                                                                |
| outcome-ssp.supersonicads.com         | 38                                                   | 22                           | Advertising                                                                                                |
| a.applovin.com                        | 24                                                   | 22                           | Monetization, "get access to more buyers and higher eCPMs"                                                 |
| static.ssacdn.com                     | 22                                                   | 22                           | Couldn't find                                                                                              |

|                                      |    |    |                                                                                                                                                  |
|--------------------------------------|----|----|--------------------------------------------------------------------------------------------------------------------------------------------------|
| data.flurry.com                      | 40 | 21 | App analytics and 'promotions'. States allows apps to 'target users' and behavioral messaging based on user behavior and demographic information |
| track.atom-data.io                   | 25 | 21 | Data collection/management- "query and manage data sources"                                                                                      |
| content.tapjoy.com                   | 36 | 20 | Advertising                                                                                                                                      |
| impression.appsflyer.com             | 31 | 20 | Advertising                                                                                                                                      |
| d.applovin.com                       | 18 | 18 | Monetization, "get access to more buyers and higher eCPMs"                                                                                       |
| events.appsflyer.com                 | 74 | 16 | Marketing analytics                                                                                                                              |
| stats.unity3d.com                    | 20 | 14 | Advertising                                                                                                                                      |
| api.gameanalytics.com                | 29 | 12 | Player tracking                                                                                                                                  |
| setting.rayjump.com                  | 18 | 12 | Couldn't find                                                                                                                                    |
| analytics.rayjump.com                | 12 | 12 | Couldn't find                                                                                                                                    |
| rt.applovin.com                      | 13 | 11 | Advertising                                                                                                                                      |
| vast.kidoz.net                       | 12 | 11 | In-app monetization                                                                                                                              |
| publisher-event.unityads.unity3d.com | 11 | 11 | Advertising                                                                                                                                      |
| control.kochava.com                  | 26 | 10 | "People-based" marketing - "enrich user identities, segment and activate audiences, and measure and optimize their campaigns"                    |
| api.uca.cloud.unity3d.com            | 20 | 10 | Advertising                                                                                                                                      |
| impact.applifier.com                 | 11 | 10 | Cross-promotion network for social games and apps - acquired by unity                                                                            |
| click-haproxy.supersonicads.com      | 10 | 10 | Monetization and marketing                                                                                                                       |
| analytics.localytics.com             | 30 | 9  | Mmobile app marketing and analytics                                                                                                              |
| net.rayjump.com                      | 16 | 9  | Advertising                                                                                                                                      |
| vast.streamrail.net                  | 9  | 9  | Platform with ad monetization and analytics                                                                                                      |
| med.heyzap.com                       | 18 | 8  | Advertising                                                                                                                                      |
| pssvc.iqzone.com                     | 16 | 8  | Links to multiple ad networks                                                                                                                    |
